# Supplementary material for: Glutathione as a Molecular Marker of Functional Impairment in Patients with At-Risk Mental State: 7-Tesla 1H-MRS Study
Source: MDPI journal article supplement (doi:10.3390/brainsci11070941), 2021-07-17
Supplement: s1 [file s1]

## Supplementary Materials

### Metabolite Profiles

Out of 17 neurometabolites included in the spectral fitting template, eight metabolites passed the  $\leq 45\%$  individual CRLB threshold (Table S1).

**Table S1.** Mean metabolite concentration (SD) and mean CRLB (SD).

|                        | [CHR]        | CRLB <sub>CHR</sub> | [HC]         | CRLB <sub>HC</sub> |
|------------------------|--------------|---------------------|--------------|--------------------|
| <b>NAA</b>             | 10.81 (0.96) | 1.01 (0.23)         | 10.36 (1.16) | 1.01 (0.41)        |
| <b>Choline</b>         | 2.51 (0.32)  | 1.99 (0.42)         | 2.45 (0.27)  | 1.85 (0.53)        |
| <b>Creatine</b>        | 8.96 (0.84)  | 1.35 (0.22)         | 8.48 (0.88)  | 1.29 (0.30)        |
| <b>Glutamate</b>       | 6.66 (0.77)  | 3.74 (0.74)         | 6.56 (0.88)  | 3.38 (0.97)        |
| <b>Glutamine</b>       | 1.02 (0.27)  | 22.84 (8.26)        | 1.05 (0.28)  | 19.62 (6.59)       |
| <b>Glutathione</b>     | 1.62 (0.32)  | 10.95 (3.74)        | 1.49 (0.24)  | 10.56 (3.63)       |
| <b>Myo-inositol</b>    | 4.76 (0.68)  | 4.47 (0.85)         | 4.72 (0.69)  | 4.08 (1.13)        |
| <b>Scyllo-inositol</b> | 0.31 (0.14)  | 24.53 (11.49)       | 0.30 (0.12)  | 20.27 (6.74)       |
| <b>Taurine</b>         | 1.16 (0.44)  | 27.24 (8.34)        | 1.10 (0.43)  | 25.27 (7.80)       |

*SD* standard deviation, *CRLB* Cramer-Rao lower bound, *CHR* clinical high-risk, *HC* healthy controls, *NAA* N-acetyl aspartate

Note: Mean (SD) concentration and CRLB units are measured in mM and %, respectively. Only those metabolites with  $CRLB \leq 45\%$  were included in this table (all CRLB outliers of  $\geq 45\%$  were removed). As a result, HC glutamine, scyllo-inositol, and taurine had  $N = 29$  while CHR glutamine, myo-inositol, and scyllo-inositol had  $N = 12$ , and CHR taurine had  $N = 11$ . All other HC ( $N = 30$ ) and CHR ( $N = 13$ ) metabolites listed included the whole participant pool. All other metabolites in our fitting template not listed in this table were due to poor CRLB measurements.

## Supplementary Table Captions

**Table S1.** Mean metabolite concentration (SD) and mean CRLB (SD).
